# Supplementary material for: Metal-containing polymers bearing pendant nickel(ii) complexes of Goedken's macrocycle
Source: Royal Society of Chemistry journal article supplement (doi:10.1039/c7py00259a), 2017-01-01
Supplement: c7py00259a1.pdf [file c7py00259a1.pdf]

## Supplementary Information

# Metal-containing polymers bearing pendant nickel(II) complexes of Goedken's macrocycle

*Joseph A. Paquette, Amir Rabiee Kenaree and Joe B. Gilroy\**

Department of Chemistry and the Centre for Advanced Materials and Biomaterials Research  
(CAMBR), The University of Western Ontario, 1151 Richmond St. N., London, Ontario,  
Canada, N6A 5B7. Tel: +1-519-661-2111 ext. 81561; E-mail: joe.gilroy@uwo.ca

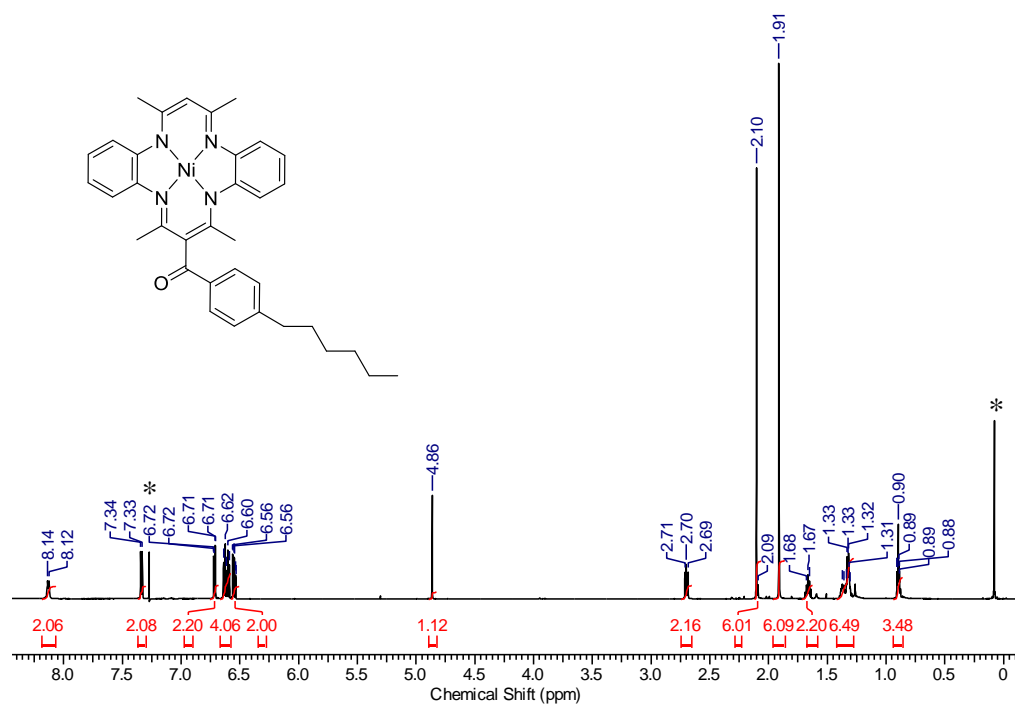

**Fig. S1**  $^1\text{H}$  NMR spectrum of compound **9** in  $\text{CDCl}_3$ . Asterisks denote residual  $\text{CHCl}_3$  and grease.

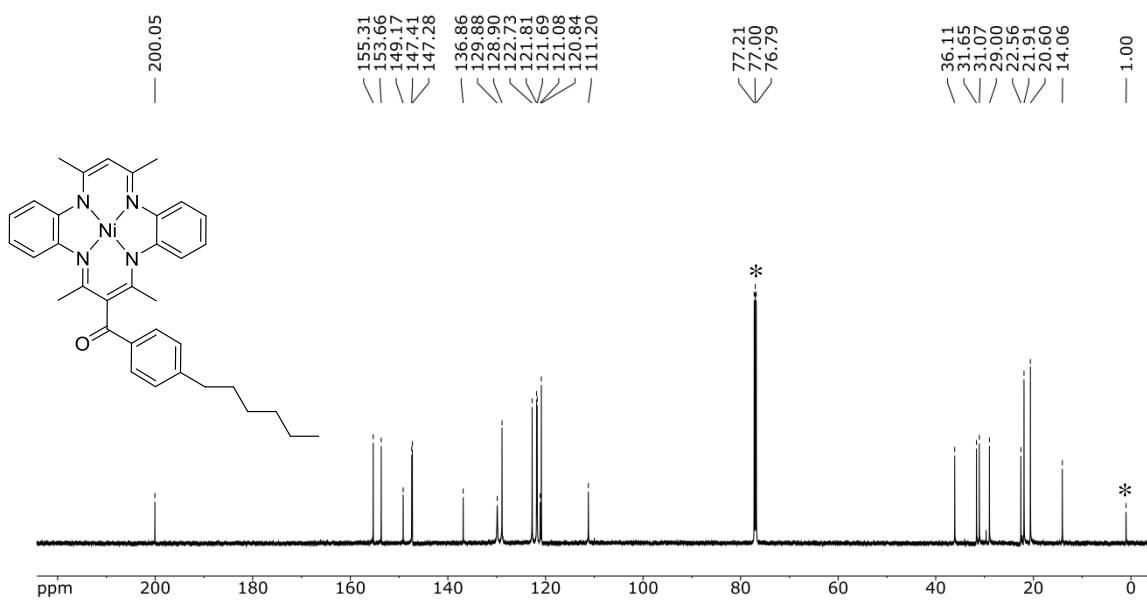

**Fig. S2**  $^{13}\text{C}\{^1\text{H}\}$  NMR spectrum of **9** in  $\text{CDCl}_3$ . Asterisks denote  $\text{CDCl}_3$  and grease.

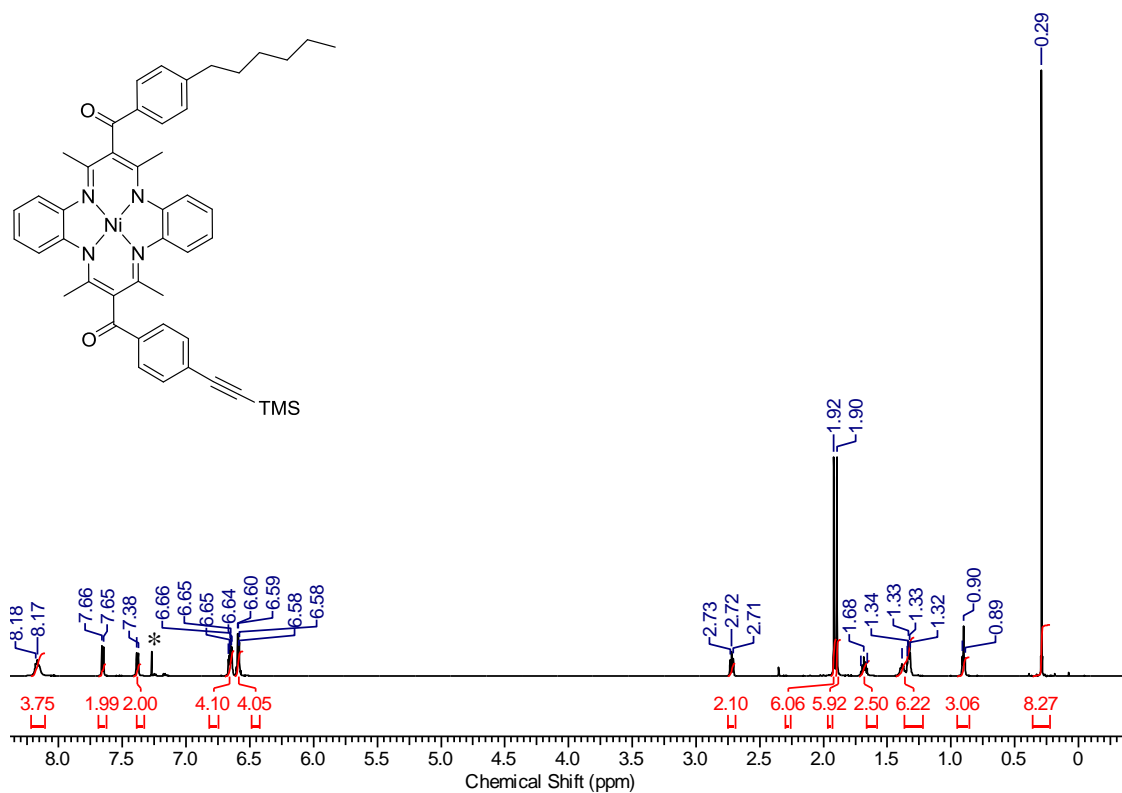

**Fig. S3**  $^1\text{H}$  NMR spectrum of compound **10** in  $\text{CDCl}_3$ . Asterisk denotes residual  $\text{CHCl}_3$ .

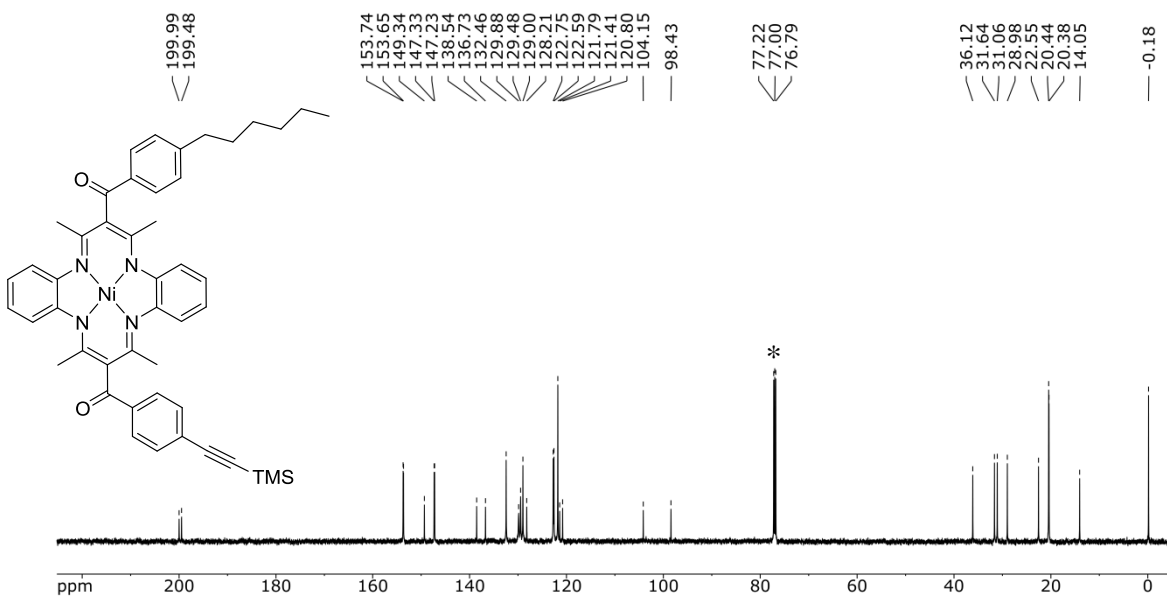

**Fig. S4**  $^{13}\text{C}\{^1\text{H}\}$  NMR spectrum of **10** in  $\text{CDCl}_3$ . Asterisk denotes  $\text{CDCl}_3$ .

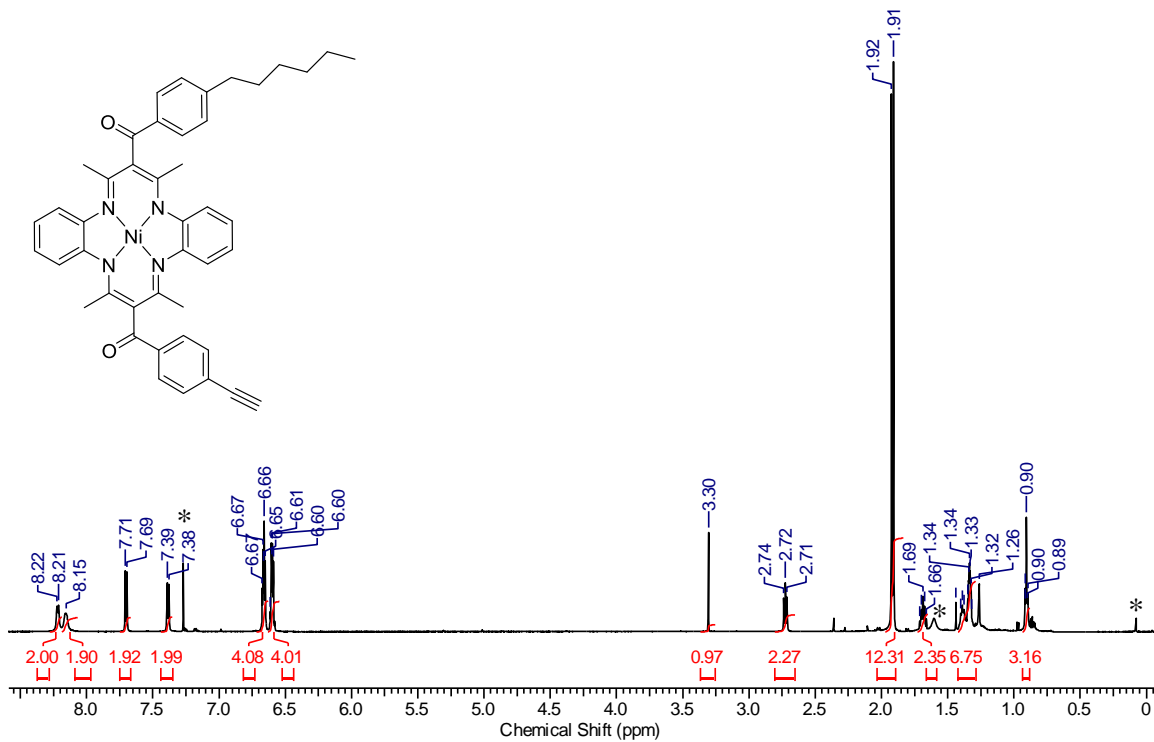

**Fig. S5**  $^1\text{H}$  NMR spectrum of compound **11** in  $\text{CDCl}_3$ . Asterisks denote residual  $\text{CHCl}_3$ ,  $\text{H}_2\text{O}$ , and grease.

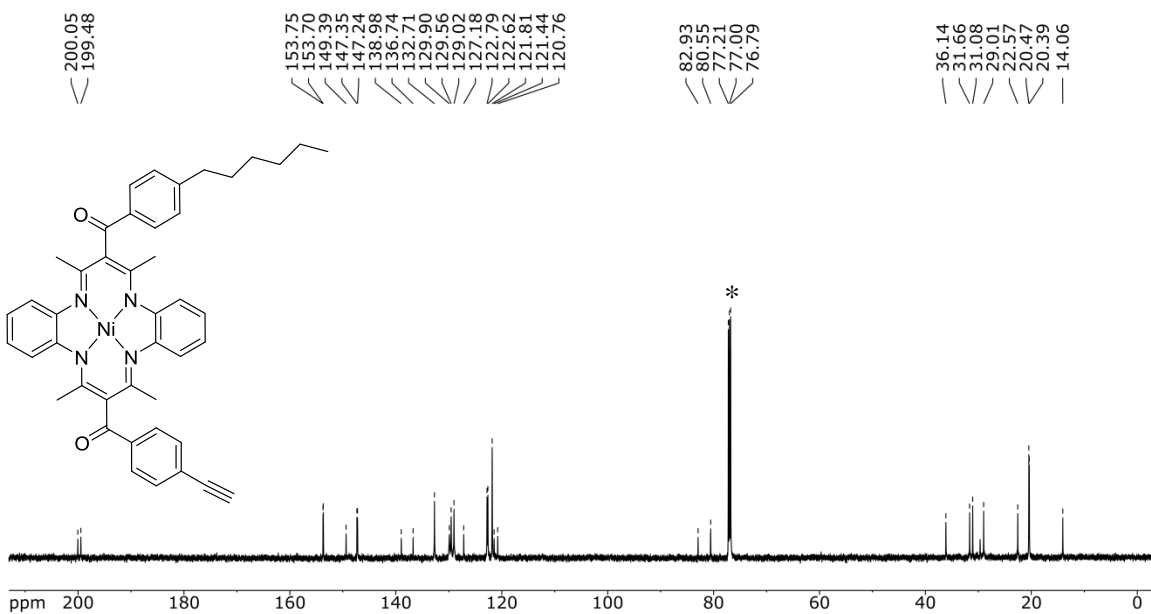

**Fig. S6**  $^{13}\text{C}\{^1\text{H}\}$  NMR spectrum of **11** in  $\text{CDCl}_3$ . Asterisk denotes  $\text{CDCl}_3$ .

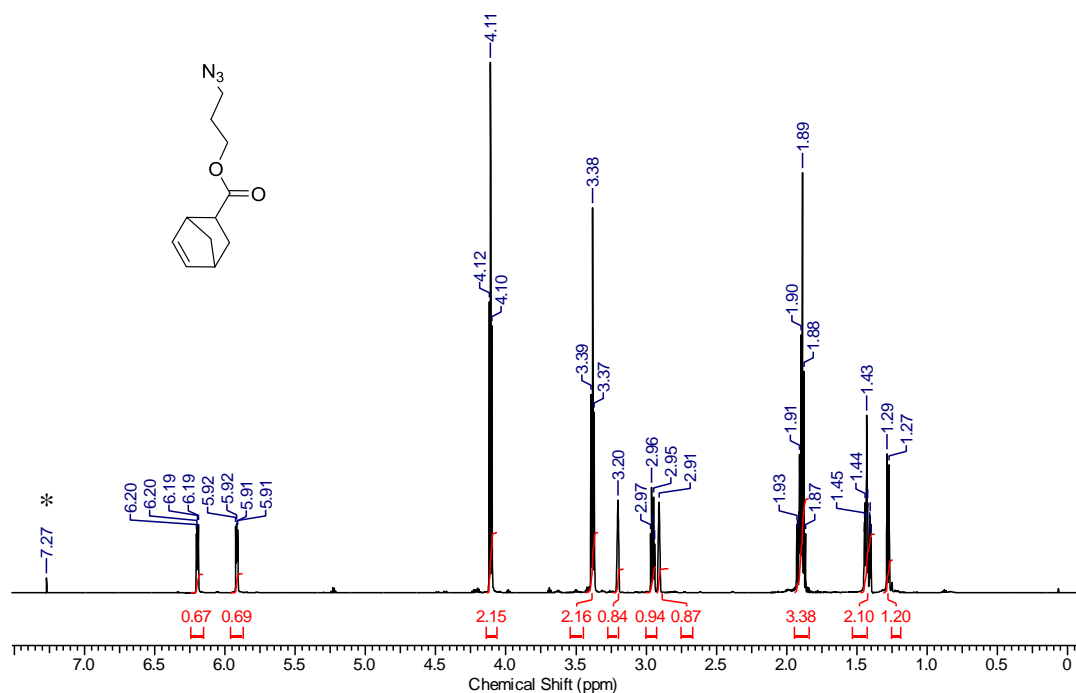

**Fig. S7**  $^1\text{H}$  NMR spectrum of compound *endo-12* in  $\text{CDCl}_3$ . Asterisk denotes residual  $\text{CHCl}_3$ .

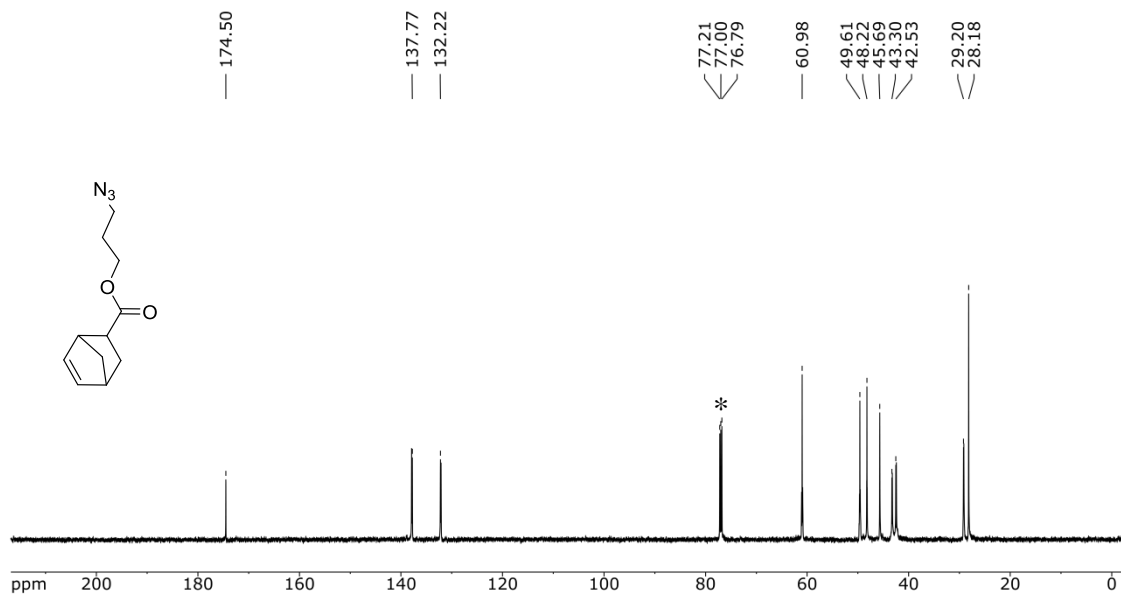

**Fig. S8**  $^{13}\text{C}\{^1\text{H}\}$  NMR spectrum of *endo-12* in  $\text{CDCl}_3$ . Asterisk denotes  $\text{CDCl}_3$ .

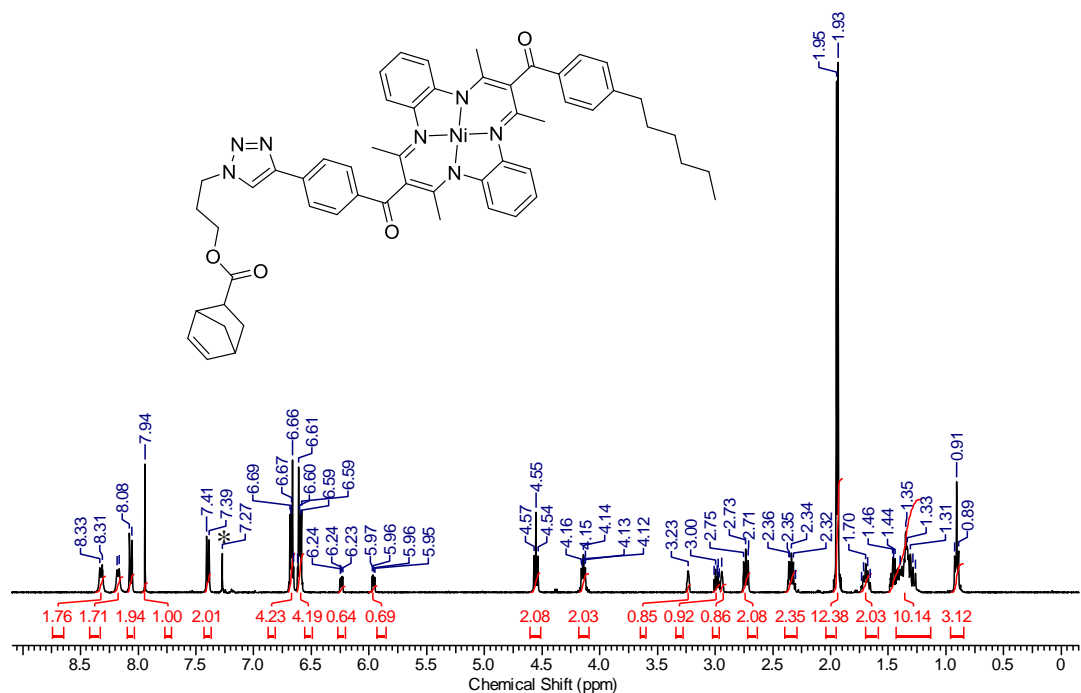

**Fig. S9**  $^1\text{H}$  NMR spectrum of compound *endo-13* in  $\text{CDCl}_3$ . Asterisk denotes residual  $\text{CHCl}_3$ .

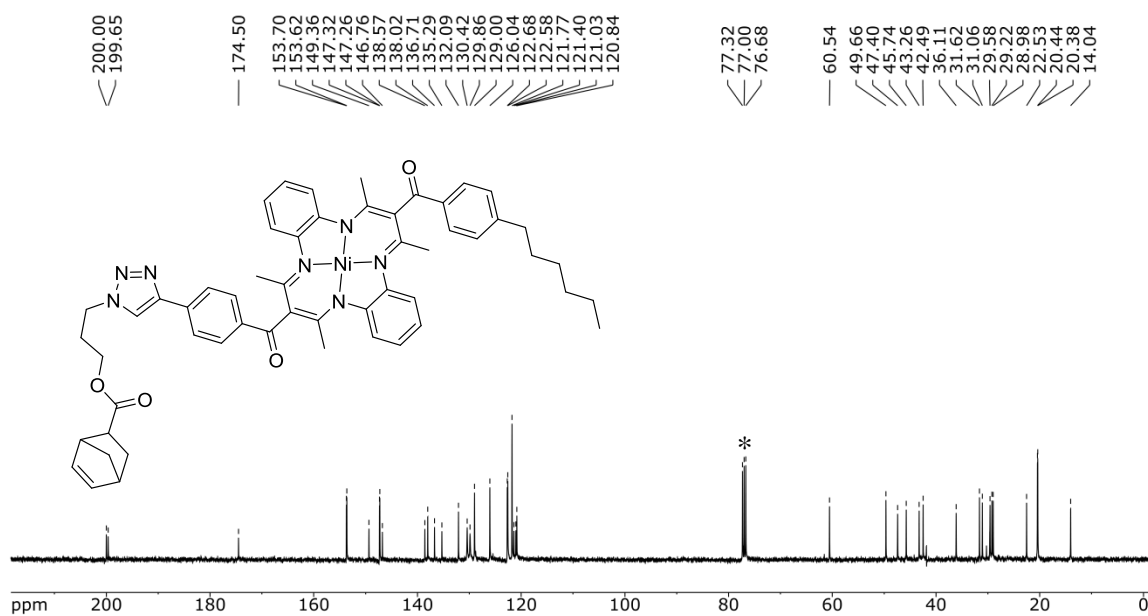

**Fig. S10**  $^{13}\text{C}\{^1\text{H}\}$  NMR spectrum of *endo-13* in  $\text{CDCl}_3$ . Asterisk denotes  $\text{CDCl}_3$ .

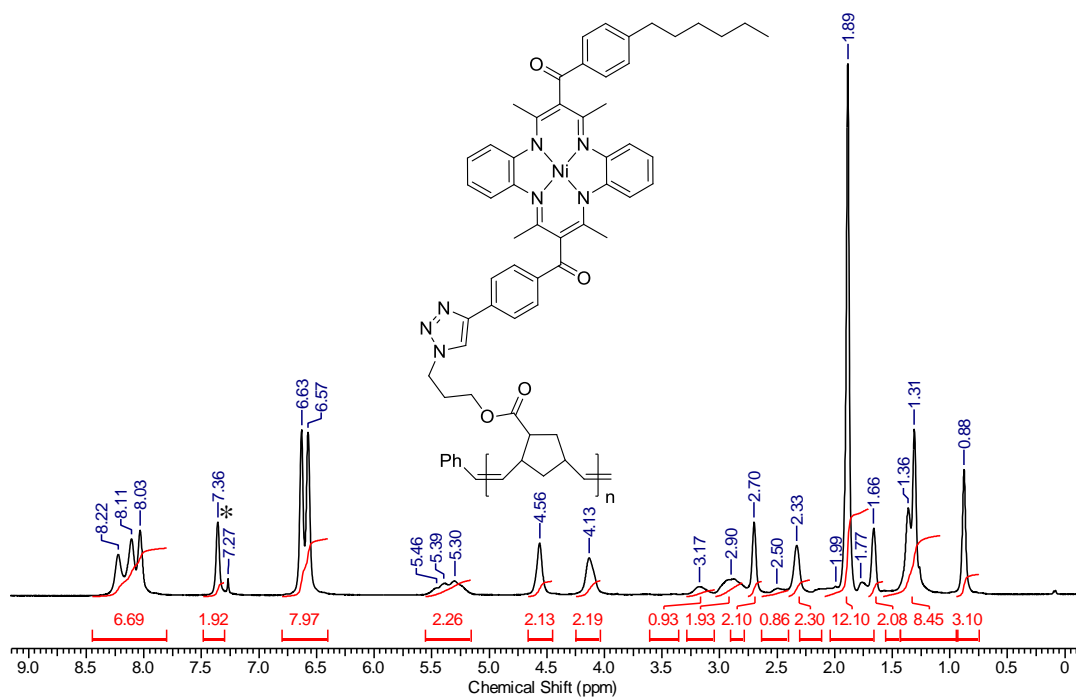

**Fig. S11** Representative <sup>1</sup>H NMR spectrum of polymer **14** in CDCl<sub>3</sub>. Asterisk denotes residual CHCl<sub>3</sub>.

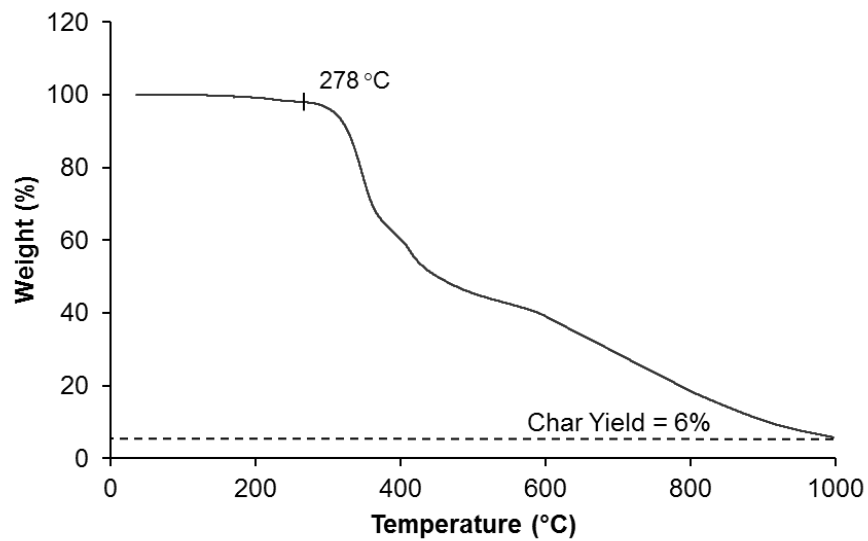

**Fig. S12** TGA trace for polymer **14**.

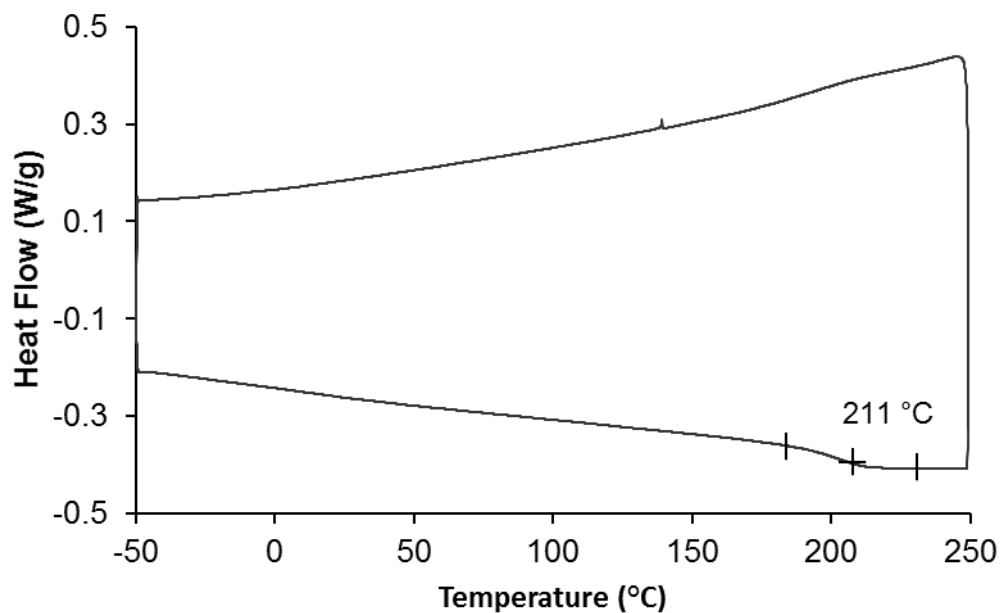

**Fig. S13** DSC thermogram of polymer **14**. The data presented are from the second heating/cooling cycle.

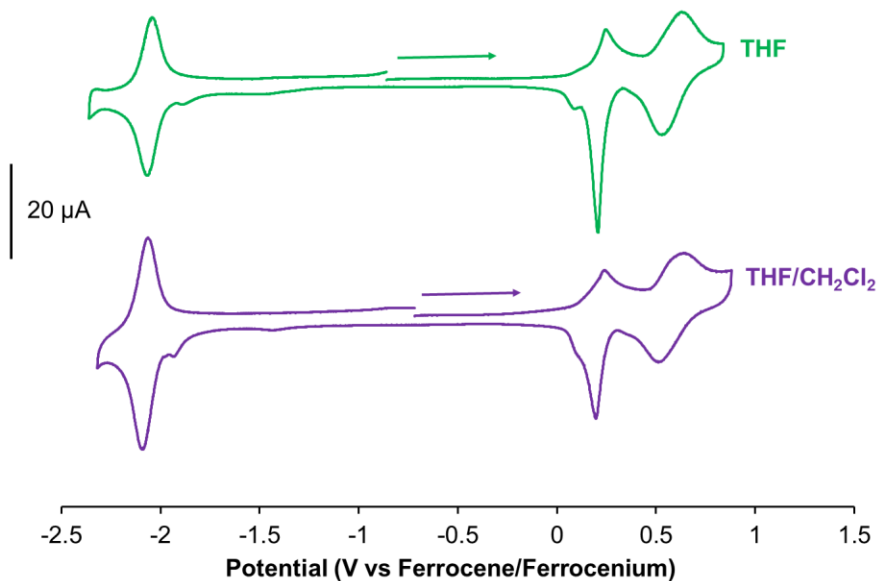

**Fig. S14** Cyclic voltammograms of polymer **14** recorded at a scan rate of  $250 \text{ mV s}^{-1}$  in THF (green) and THF/ $\text{CH}_2\text{Cl}_2$  (1/1) (purple) solutions containing  $1 \times 10^{-3} \text{ M}$  analyte and  $0.1 \text{ M}$   $[\text{nBu}_4\text{N}][\text{PF}_6]$  as supporting electrolyte.
